# Supplementary material for: The New Buffer Salt-Protected Sodium Butyrate Promotes Growth Performance by Improving Intestinal Histomorphology, Barrier Function, Antioxidative Capacity, and Microbiota Community of Broilers
Source: MDPI journal article supplement (doi:10.3390/biology13050317), 2024-05-01
Supplement: s1 [file s1]

**Supplementary Table S1.** Primers used for real-time quantitative PCR (RT-qPCR) analysis.

| Gene           | Forward primer (5' s) and Reverse primer (3's)          | GenBank Accession No. | Bp (product size) |
|----------------|---------------------------------------------------------|-----------------------|-------------------|
| ZO-1           | F: AATACCTGACTGTCTTGCAG<br>R: TAAAGAAGGCTTTCCTGAC       | XM_015278975.1        | 145               |
| Claudin-1      | F: CAGACTCTAGGTTTTGCCTT<br>R: AATCTTTCCAGTGGCGATAC      | NM_001013611.2        | 149               |
| Occludin       | F: TCGTGCTGTGCATCGCCATC<br>R: CGCTGGTTCACCCCTCCGTA      | NM_205128.1           | 178               |
| Mucin-2        | F: CTGATTGTCACTCACGCCTTAATC<br>R: GCCGGCCACCTGCAT       | XM_001234581.3        | 147               |
| $\beta$ -actin | F: ACCTGAGCGCAAGTACTCTGTCT<br>R: CATCGTACTCCTGCTTGCTGAT | NM_205518.1           | 95                |
